# Supplementary material
Source: MDPI journal article supplement (https://www.mdpi.com/2313-0105/10/6/207)
Supplement: s1 [file batteries-3033535-supplementary.pdf › batteries-3033535-supplementary.pdf]

## Supplementary Information

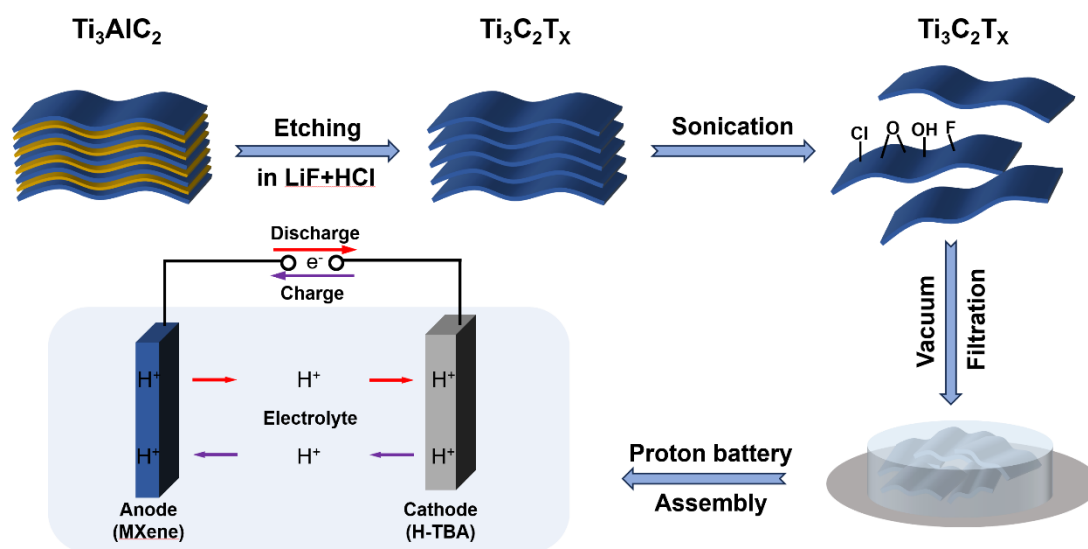

**Scheme S1** Synthesis scheme of the vacuum-filtered  $\text{Ti}_3\text{C}_2\text{T}_x$  film electrode and assembly schematic of the proton battery.

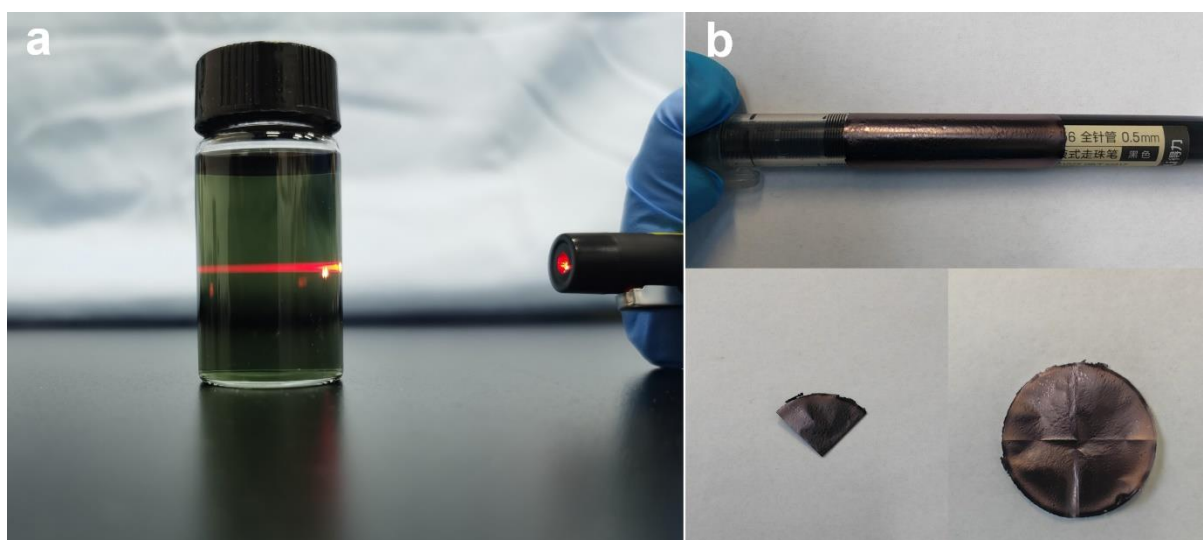

**Figure S1** (a) Dingdall phenomenon of diluted few-layer  $\text{Ti}_3\text{C}_2\text{T}_x$  colloidal solution. (b) Optical image of the vacuum-filtered  $\text{Ti}_3\text{C}_2\text{T}_x$  MXene film. The film exhibits excellent flexibility.

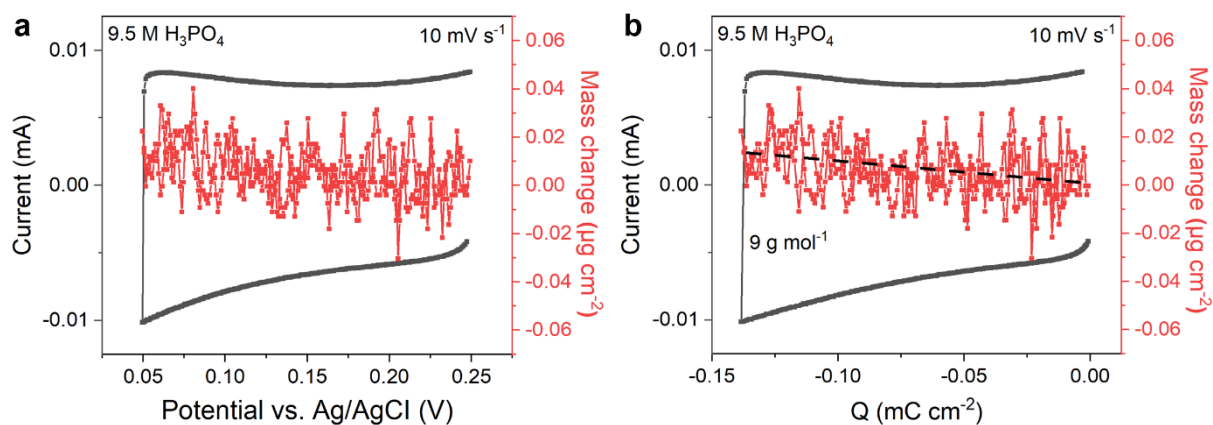

**Figure S2** (a) CV profile and electrode mass response and (b) electrode mass change versus charge for  $\text{Ti}_3\text{C}_2\text{T}_x$  MXene on an Au-coated quartz crystals substrate recorded at  $10 \text{ mV s}^{-1}$  with a potential range of 0.05 to 0.25 V in 9.5 M  $\text{H}_3\text{PO}_4$ .

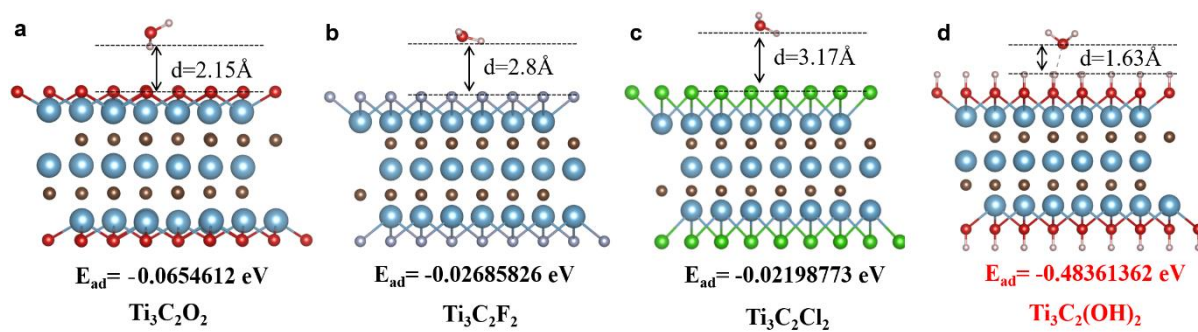

**Figure S3** Adsorption energy of  $\text{H}_2\text{O}$  on the surface of (a)  $\text{Ti}_3\text{C}_2\text{O}_2$ , (b)  $\text{Ti}_3\text{C}_2\text{F}_2$ , (c)  $\text{Ti}_3\text{C}_2\text{Cl}_2$ , and (d)  $\text{Ti}_3\text{C}_2(\text{OH})_2$ .

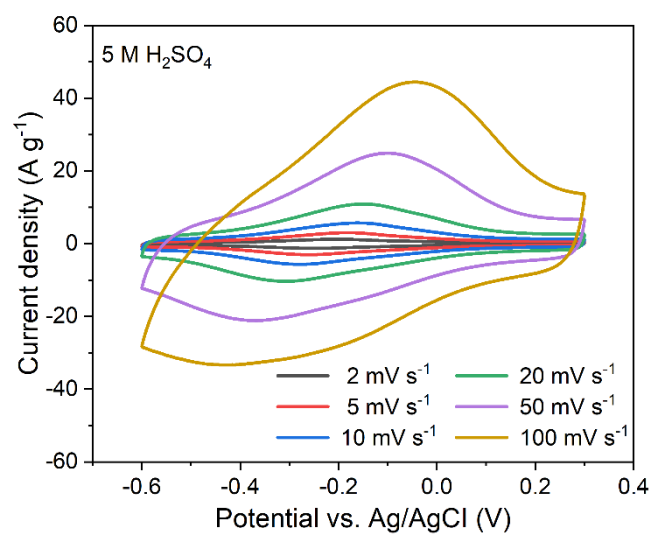

**Figure S4** Cyclic voltammograms of the  $\text{Ti}_3\text{C}_2\text{T}_x$  MXene film electrode measured at different scan rates in  $5\text{ M H}_2\text{SO}_4$ .

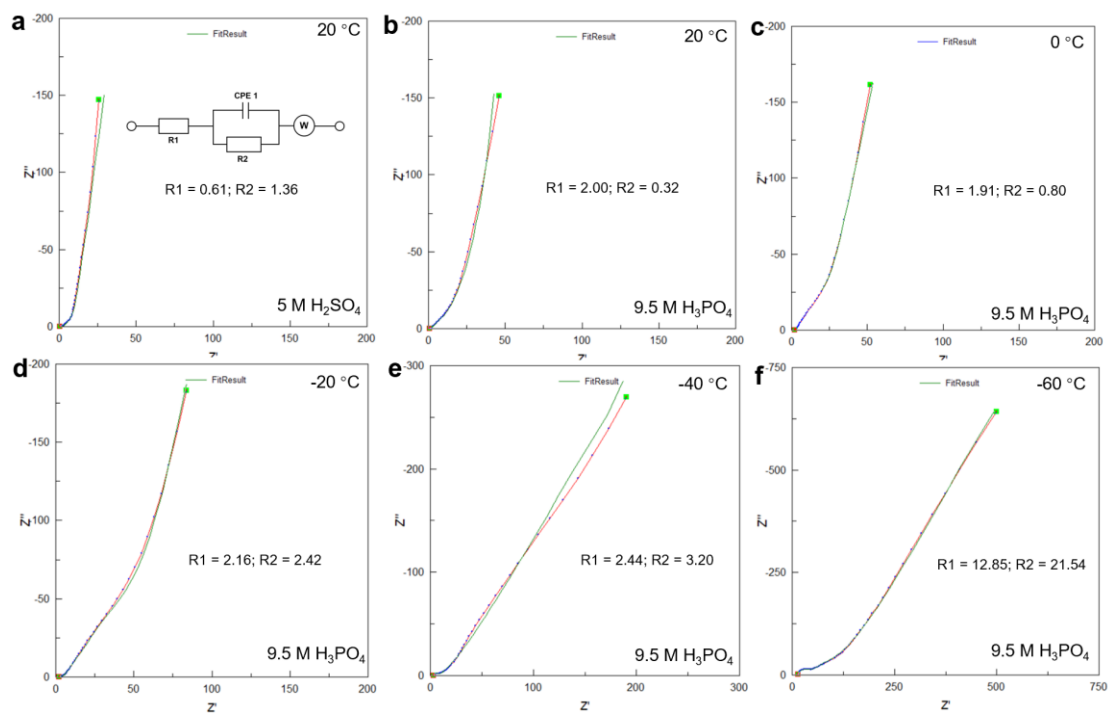

**Figure S5** Fitted EIS plots shown in Figure 4d and 4e using Zview software.

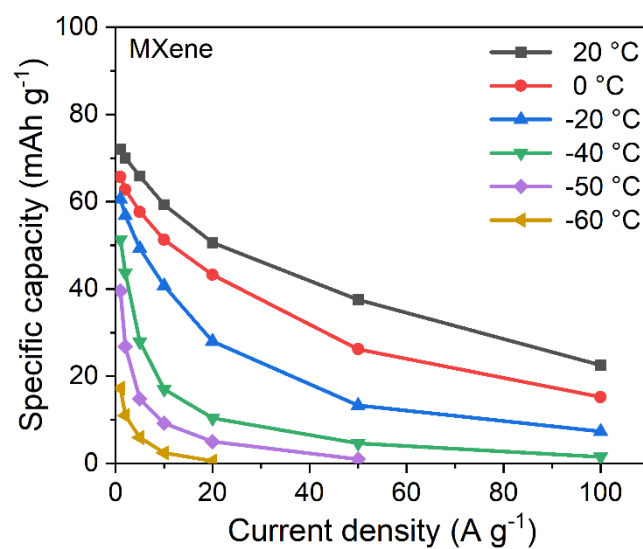

**Figure S6** Specific gravimetric capacity vs. current density for  $\text{Ti}_3\text{C}_2\text{T}_x$  MXene film electrode measured at different temperatures in 9.5 M  $\text{H}_3\text{PO}_4$ .

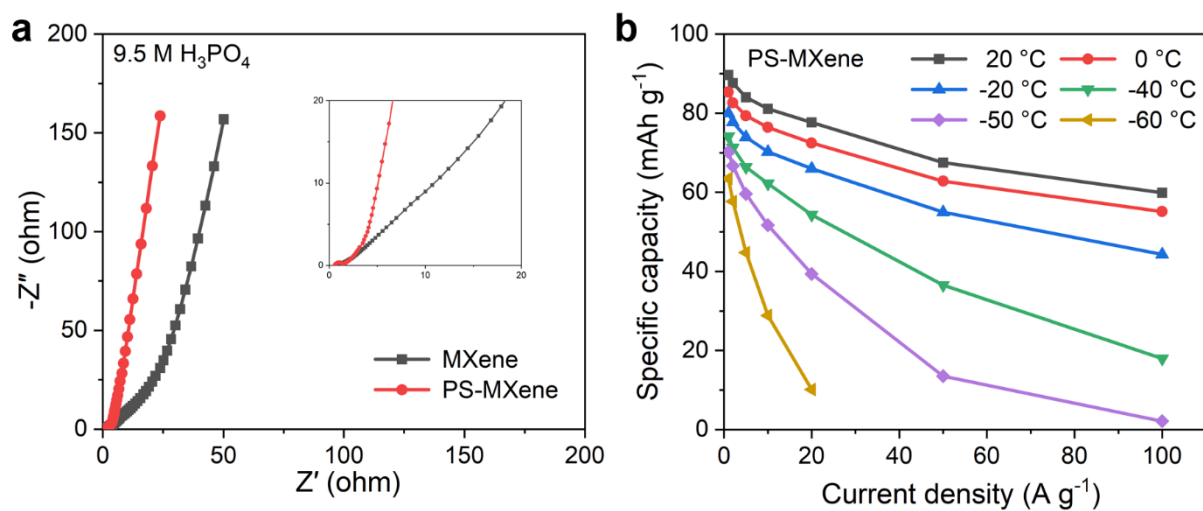

**Figure S7** (a) Electrochemical impedance spectroscopy of the  $Ti_3C_2T_x$  MXene and PS-MXene film electrodes collected at 0.2 V *vs.* Ag/AgCl in 9.5 M  $H_3PO_4$ . The inset shows the high-frequency range. (b) Specific gravimetric capacity *vs.* current density for PS-MXene film electrode at different temperatures.



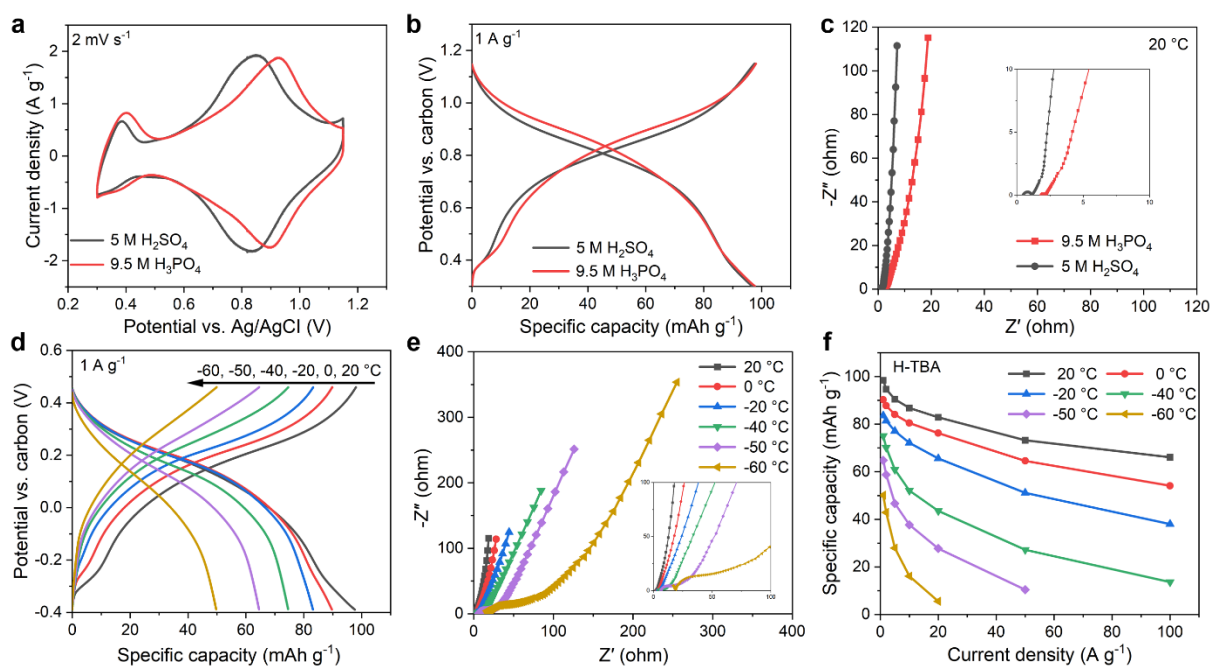

**Figure S8 Electrochemical performance of H-TBA in acid electrolyte.** (a) Cyclic voltammograms of H-TBA at a scan rate of 2 mV s<sup>-1</sup> in 5 M H<sub>2</sub>SO<sub>4</sub> and 9.5 M H<sub>3</sub>PO<sub>4</sub>, respectively. (b) Galvanostatic charge-discharge profiles of H-TBA at a current density of 1 A g<sup>-1</sup> in 5 M H<sub>2</sub>SO<sub>4</sub> and 9.5 M H<sub>3</sub>PO<sub>4</sub>. (c) Electrochemical impedance spectroscopy of H-TBA collected at 0.8 V vs. Ag/AgCl in 5 M H<sub>2</sub>SO<sub>4</sub> and 9.5 M H<sub>3</sub>PO<sub>4</sub>. The inset shows the high-frequency range. (d) Galvanostatic cycling profiles of H-TBA at different temperatures with current density of 1 A g<sup>-1</sup> in 9.5 M H<sub>3</sub>PO<sub>4</sub>. (e) Electrochemical impedance spectroscopy data of H-TBA collected at 0.1 V vs. carbon at different temperatures in 9.5 M H<sub>3</sub>PO<sub>4</sub>. The inset shows the high-frequency range. (f) Specific gravimetric capacity vs. current density for H-TBA at different temperatures.

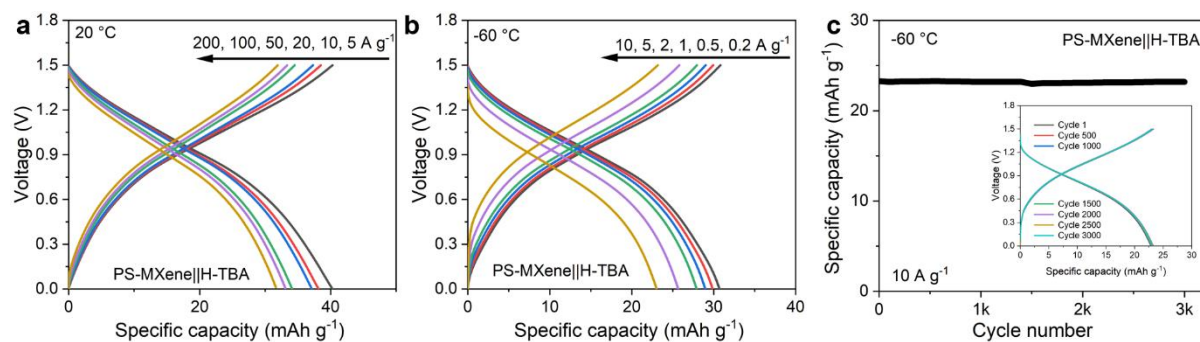

**Figure S9 Electrochemical performance of PS-MXene||H-TBA proton battery in 9.5 M**

**$\text{H}_3\text{PO}_4$ .** (a) Galvanostatic charge-discharge profiles of proton battery measured at 20 °C with

(a) current densities of 5, 10, 20, 50, 100, 200  $\text{A g}^{-1}$  and (b) -60 °C with current densities of

0.2, 0.5, 2, 5, 10  $\text{A g}^{-1}$ . (c) Capacity retention of PS-MXene||H-TBA proton battery at -60 °C.

The inset shows galvanostatic cycling data collected at 10  $\text{A g}^{-1}$ .

**Table S1** Comparison of some previous studies that used acidic electrolyte

| Anode                                                         | Cathode          | Electrolyte                                               | Temp. | Capacity                                                              | Cycling at room T                          |
|---------------------------------------------------------------|------------------|-----------------------------------------------------------|-------|-----------------------------------------------------------------------|--------------------------------------------|
| Ti <sub>3</sub> C <sub>2</sub> T <sub>x</sub> <sup>[S1]</sup> | AC               | 5 M H <sub>2</sub> SO <sub>4</sub>                        | -50°C | 88 mAh g <sup>-1</sup> at -50°C, 104 mAh g <sup>-1</sup> at 20°C      | 78% capacity retention after 20,000 cycles |
| MoO <sub>3</sub> <sup>[S2]</sup>                              | APB              | 9.5 M H <sub>3</sub> PO <sub>4</sub>                      | -78°C | 180 mAh g <sup>-1</sup> at -40°C, 220 mAh g <sup>-1</sup> at 20°C     | ~85% capacity retention after 200 cycles   |
| MoO <sub>3</sub> <sup>[S3]</sup>                              | MnO <sub>2</sub> | 2 M H <sub>2</sub> SO <sub>4</sub> +2 M MnSO <sub>4</sub> | -70°C | 170.8 mAh g <sup>-1</sup> at -70°C, 210.7 mAh g <sup>-1</sup> at 20°C | 81% capacity retention after 300 cycles    |
| PTO <sup>[S4]</sup>                                           | MnO <sub>2</sub> | 2 M H <sub>2</sub> SO <sub>4</sub> +2 M MnSO <sub>4</sub> | -70°C | 105 mAh g <sup>-1</sup> at -70°C, 150 mAh g <sup>-1</sup> at 20°C     | 80% capacity retention after 5,000 cycles  |
| Ti <sub>3</sub> C <sub>2</sub> T <sub>x</sub><br>(This work)  | H-TBA            | 9.5 M H <sub>3</sub> PO <sub>4</sub>                      | -60°C | 64 mAh g <sup>-1</sup> at -60°C, 90 mAh g <sup>-1</sup> at 20°C       | No capacity fading after 25,000 cycles     |

## References

- [S1] J. Xu, X. Hu, X. Wang, X. Wang, Y. Ju, S. Ge, X. Lu, J. Ding, N. Yuan, Y. Gogotsi, Low-temperature pseudocapacitive energy storage in Ti<sub>3</sub>C<sub>2</sub>T<sub>x</sub> MXene. *Energy Storage Mater.* **33**, 382–389 (2020).
- [S2] H. Jiang, W. Shin, L. Ma, J. J. Hong, Z. Wei, Y. Liu, S. Zhang, X. Wu, Y. Xu, Q. Guo, M. A. Subramanian, W. F. Stickle, T. Wu, J. Lu, X. Ji, A high-rate aqueous proton battery delivering power below -78 °C via an unfrozen phosphoric acid. *Adv. Energy Mater.* **10**, 2000968 (2020).
- [S3] L. Yan, J. Huang, Z. Guo, X. Dong, Z. Wang, Y. Wang, Solid-State Proton Battery Operated at Ultralow Temperature. *ACS Energy Lett.* **5**, 685-691 (2020).
- [S4] Z. Guo, J. Huang, X. Dong, Y. Xia, L. Yan, Z. Wang, Y. Wang, An organic/inorganic electrode-based hydronium-ion battery. *Nat. Commun.* **11**, 959 (2020).
